# Supplementary material
Source: MDPI journal article supplement (https://www.mdpi.com/2073-4344/13/3/625)
Supplement: s1 [file s1]

## Supplementary material

The parameters  $\alpha$ ,  $\beta$  and  $\gamma$  of the mathematical expression of the GAB adsorption model (Equation (S1)), were determined by adjusting the data of  $C_{eq}/C_{ads}$  versus  $C_{eq}$  to a polynomial function.

$$\frac{C_{eq}}{C_{ads}} = \alpha C_{eq}^2 + \beta C_{eq} + \gamma \quad (S1)$$

Then, the expressions of  $\alpha$ ,  $\beta$  and  $\gamma$  shown in the Equations (S2)–(S4), allowed calculating the parameters  $W_m$ ,  $k$  and  $C$ .

$$\alpha = \frac{k}{W_m} \left( \frac{1}{C} - 1 \right) \quad (S2)$$

$$\beta = \frac{1}{W_m} \left( 1 - \frac{2}{C} \right) \quad (S3)$$

$$\gamma = \frac{1}{W_m C k} \quad (S4)$$

First, the equations (S2) and (S3) were expressed in terms of  $k$  and  $W_m$ ,

$$k = \frac{W_m \alpha}{\left( \frac{1}{C} - 1 \right)} \quad (S5)$$

$$W_m = \frac{1}{\beta} \left( 1 - \frac{2}{C} \right) \quad (S6)$$

Then, the parameter  $W_m$  is substituted in the eq. (S5) by the eq. (S6),

$$k = \frac{1}{\beta} \left( 1 - \frac{2}{C} \right) \alpha \frac{1}{\left( \frac{1}{C} - 1 \right)} \quad (S7)$$

Then, the parameters  $W_m$  (Equation (S6)) and  $k$  (Equation (S7)) are substituted in the Equation (S4). Finally, the quadratic equation shown in (Equation (S13)) allows to obtain the parameter  $C$ .

$$\gamma = \frac{\beta}{\left( 1 - \frac{2}{C} \right)} \frac{1}{C} \frac{\beta}{\left( 1 - \frac{2}{C} \right)} \frac{\left( \frac{1}{C} - 1 \right)}{\alpha} \quad (S8)$$

$$\gamma = \frac{\beta^2}{\alpha} \frac{1}{C} \frac{1}{\left( \frac{4}{C^2} - \frac{4}{C} + 1 \right)} \frac{\left( \frac{1}{C} - 1 \right)}{1} \quad (S9)$$

$$\gamma = \frac{\beta^2}{\alpha} \frac{1}{\left( \frac{4}{C} - 4 + C \right)} \frac{\left( \frac{1}{C} - 1 \right)}{1} \quad (S10)$$

$$\gamma = \frac{\beta^2}{\alpha} \frac{(1 - C)}{(4 - 4C + C^2)} \quad (S11)$$

$$4\gamma - 4\gamma C + \gamma C^2 = \frac{\beta^2}{\alpha} (1 - C) \quad (\text{S12})$$

$$\gamma C^2 + \left( \frac{\beta^2}{\alpha} - 4\gamma \right) C + \left( 4\gamma - \frac{\beta^2}{\alpha} \right) = 0 \quad (\text{S13})$$

The value of  $\gamma$  equals to 4.6122 according to the polynomial fitting of the experimental data. Then, the equation (S13) becomes in the following expression,

$$4.6122 C^2 - 498.6968 C + 498.6968 = 0 \quad (\text{S14})$$
